# Auditory Brainstem Responses in the C57BL/6J Fragile X Syndrome Knockout Mouse Model

1 **Amita Chawla<sup>1</sup>, Elizabeth A McCullagh<sup>1\*</sup>**

2 <sup>1</sup>Department of Integrative Biology, Oklahoma State University, Stillwater, OK, USA

3 **\*Correspondence:**

4 Corresponding Author

5 [elizabeth.mccullagh@okstate.edu](mailto:elizabeth.mccullagh@okstate.edu)

6 **Keywords:** Auditory Brainstem Response (ABR), Fragile X Syndrome, binaural hearing, sex  
7 differences, mouse model

8 **Abstract (250 words)**

9 Sensory hypersensitivity, especially in the auditory system, is a common symptom in Fragile X  
10 Syndrome (FXS), the most common monogenic form of intellectual disability. However, linking  
11 phenotypes across genetic background strains of mouse models has been a challenge and could  
12 underly some of the issues with translatability of drug studies to the human condition. This study is  
13 the first to characterize the auditory brainstem response (ABR), a minimally invasive physiological  
14 readout of early auditory processing that is also used in humans, in a commonly used mouse  
15 background strain model of FXS, C57BL/6J. We measured morphological features of pinna and head  
16 and used ABR to measure hearing range, monaural and binaural auditory responses in hemizygous  
17 males, homozygous females and heterozygous females compared to wildtype mice. Consistent with  
18 previous work we showed no difference in morphological parameters across genotypes or sexes.  
19 Male FXS mice had increased threshold for high frequency hearing at 64 kHz compared to wildtype  
20 males, while females had no difference in hearing range between genotypes. In contrast, female  
21 homozygous FXS mice had decreased amplitude of wave IV of the monaural ABR, while there was  
22 no difference in males for amplitudes and no change in latency of ABR waveforms across sexes and  
23 genotypes. Lastly, FXS males had increased latency of the binaural interaction component (BIC) at 0  
24 ITD compared to wildtype males. These findings further clarify auditory brainstem processing in  
25 FXS by adding more information across genetic background strains allowing for a better  
26 understanding of shared phenotypes.

27 **1 Introduction**

28 Fragile X Syndrome (FXS) is the most common monogenic form of autism spectrum disorder (ASD)  
29 and shares many attributes of ASDs including auditory hypersensitivity and other sensory disruptions  
30 (Abbeduto and Hagerman, 1997; Chen and Toth, 2001; Hagerman and Hagerman, 2002; Arnett et al.,  
31 2014). FXS is a tractable genetic model for ASD with several commercially available models,  
32 including rat and mouse (The Dutch-Belgian Fragile X Consortium et al., 1994; Till et al., 2015;  
33 Tian et al., 2017). Despite the common use of these models to study FXS, phenotypes are not always  
34 shared between species and background strains, particularly for sensory processing. As a result, drug  
35 therapies have struggled to rescue the human disorder (Dahlhaus, 2018). One of the most common  
36 symptoms described in people with FXS and ASD is auditory hypersensitivity (Ethridge et al., 2017;  
37 Stefanelli et al., 2020). The mechanisms that underly auditory alterations are unknown, but likely  
38 involve the entirety of the ascending pathway from the periphery to the cortex (reviewed in

39 McCullagh et al., 2020b). A complete characterization of auditory processing from the periphery to  
40 cortex across sexes, background strains, and models is needed to fully understand shared phenotypes  
41 and circuitry involved in this common symptom.

42 The auditory brainstem is one brain region in the ascending auditory pathway that has shown to have  
43 anatomical, physiological, and behavioral alterations in FXS mouse models (Brown et al., 2010;  
44 Beebe et al., 2014; Wang et al., 2014, 2015; Rotschafer et al., 2015; Garcia-Pino et al., 2017;  
45 McCullagh et al., 2017, 2020a; Rotschafer and Cramer, 2017; Curry et al., 2018; El-Hassar et al.,  
46 2019; Lu, 2019). The auditory brainstem is the first site of binaural processing of sound location in  
47 the brain using interaural timing and level differences (ITD and ILD respectively) to compute sound  
48 source locations (Grothe et al., 2010). This brain area is also involved in separating spatial channels  
49 allowing for complex listening environments. Disruptions in this spatial separation and binaural  
50 processing could lead to auditory hypersensitivity due to inability to separate sound sources  
51 (Bronkhorst, 2015). One measure of auditory brainstem physiology, and binaural hearing, that can be  
52 directly translated between animal models and humans is the auditory brainstem response (ABR)  
53 (Laumen et al., 2016).

54 The ABR is a minimally invasive physiological measure that allows for simultaneous assessment of  
55 sound processing across multiple brainstem nuclei, as each wave of the ABR directly corresponds to  
56 distinct areas of the ascending auditory brainstem pathway. These features make the ABR an  
57 attractive translational tool. Indeed, recent evidence suggests that ABR measurements are an early  
58 indicator for auditory dysfunction in ASD (Santos et al., 2017). ABRs can also be used to assess  
59 binaural hearing, which is essential for sound localization and hearing in noisy environments and  
60 often impaired in ASD (Visser et al., 2013). Monoaural ABRs can be recorded by stimulating each  
61 ear separately and binaural responses can be generated by stimulating both ears simultaneously. The  
62 sum of the two monaural (left and right) responses should equal the binaural (both ear) response  
63 since the recruited neural activity from each ear should be double when stimulated simultaneously.  
64 However, this is not the case, there is a difference that arises when the summed monaural responses  
65 are subtracted from the binaural response, called the binaural interaction component (BIC). The BIC  
66 is thought to be a direct measure of binaural processing ability in humans and animals that requires  
67 the precise balance of excitatory and inhibitory drive in brainstem sound localization circuits  
68 (Laumen et al., 2016).

69 In this study we report on the hearing ability, using the ABR and morphological craniofacial and  
70 pinna features, of the most common mouse model of FXS, C57BL/6J across the sexes and females  
71 heterozygous for the *Fmr1* mutation. We hypothesize that there may be sex differences in ABRs  
72 independent of FXS genotype, but that additionally FXS animals are likely to have alterations in peak  
73 amplitude or latency of ABRs and impaired high frequency hearing compared to wildtype consistent  
74 with work in other FXS mouse strains (Kim et al., 2013; Rotschafer et al., 2015; El-Hassar et al.,  
75 2019). Establishing core auditory phenotypes across the sexes and different mouse strains is key to  
76 creating a toolbox of techniques that may translate to human FXS.

## 77 **2 Materials and Methods**

78 All experiments complied with all applicable laws, National Institutes of Health guidelines, and were  
79 approved by the Oklahoma State University IACUC.

### 80 **2.1 Animals**

81 Experiments were conducted in C57BL/6J (stock #000664, B6) wildtype background, hemizygous  
82 male, homozygous, or heterozygous female *Fmr1* mutant mice (B6.129P2-*Fmr1*<sup>tm1Cgr</sup>/J stock  
83 #003025, *Fmr1* or *Fmr1* het respectively) obtained from the Jackson Laboratory (Bar Harbor, ME  
84 USA)(The Dutch-Belgian Fragile X Consortium et al., 1994). Sex was treated as a biological  
85 variable and differences between the sexes, when present, are noted in the results. Numbers of  
86 animals for each experiment used are listed in the figure legends and ranged from 6-10 animals per  
87 sex and genotype. Animals ranged in age from 62 – 120 days old (average ages per genotype 89 ± 4  
88 days old B6, 101 ± 3 days old *Fmr1*, and 97 ± 4 days old *Fmr1* het).

## 89 **2.2 Morphological Measures**

90 Features of animal's head, pinna, and body mass (weight) were measured for each genotype using 6  
91 Inch Stainless Steel Electronic Vernier Calipers (DIGI-Science Accumatic digital caliper Gyros  
92 Precision Tools Monsey, NY, USA) and an electronic scale. The distance between the two pinnae  
93 (inter pinna distance), distance from the nose to the middle of the pinna (nose to pinna distance) and  
94 pinna width and length were measured (Figure 2A). The effective diameter was calculated as the  
95 square root of pinna length times pinna width (Anbuhl et al., 2017).

## 96 **2.3 ABRs**

97 ABR recordings were performed using similar methods to previously published work (Benichoux et  
98 al., 2018; McCullagh et al., 2020a; New et al., 2021). Animals were anesthetized using two mixtures  
99 of ketamine-xylazine 60mg/kg ketamine and 10mg/kg xylazine for initial induction followed by  
100 maintenance doses of 25 mg/kg ketamine and 12 mg/kg xylazine. Once anesthesia was confirmed by  
101 lack of a toe-pinch reflex, animals were transferred to a small sound attenuating chamber (Noise  
102 Barriers Lake Forest, IL, USA) and body temperature was maintained using a water-pump heating  
103 pad. Subdermal needle electrodes were placed under the skin between the ears (apex), directly behind  
104 the apex in the nape (reference), and in the back leg for ground. This montage has been shown to be  
105 particularly effective in generating the BIC (Levine, 1981; Laumen et al., 2016). Evoked potentials  
106 from subdermal needle electrodes were acquired and amplified using a Tucker-Davis Technologies  
107 (TDT, Alachua, FL, USA) RA4LI head stage and a TDT RA16PA preamplifier. Further  
108 amplification was provided by a TDT Multi I/O processor RZ5 connected to a PC with custom  
109 Python software for data recording. Data were averaged across 500-1000 repetitions per condition  
110 and processed using a second order 50 - 3000 Hz filter over 12 ms of recording time.

111 Sound stimuli (see below for varying types) were presented to the animal through TDT EC-1  
112 electrostatic speakers (frequencies 32 – 64 kHz) or TDT MF-1 multi-field speakers (frequencies 1 –  
113 24 kHz and clicks) coupled through custom ear pieces fitted with Etymotic ER-7C probe  
114 microphones (Etymotic Research Inc, Elk Grove Village, IL, USA) for in-ear calibration  
115 (Beutelmann et al., 2015). Sounds were generated using a TDT RP2.1 Real-Time processor  
116 controlled by custom Python code at a sampling rate of 48828.125 Hz. Sounds were presented at an  
117 interstimulus interval of 30 ms with a standard deviation of 5 ms (Laumen et al., 2016). An additional  
118 rejection threshold was set to eliminate high amplitude heart rate responses from average traces and  
119 improve signal to noise ratio.

### 120 **2.3.1 Audiogram**

121 Hearing range of animals was tested using the threshold for hearing across different frequencies of  
122 sound (1, 2, 4, 8, 16, 24, 32, 46, 64 kHz). Threshold was determined using a visual detection method

123 (Brittan-Powell and Dooling, 2004), or the lowest level (dB SPL) a response could be detected  
124 (independent of wave) or 2.5 dB SPL below the lowest level that elicited a response. Audiogram  
125 stimuli consisted of tone bursts ( $2 \text{ ms} \pm 1 \text{ ms}$  on/off ramps) of varying frequency and intensity.

### 126 2.3.2 Monaural ABRs

127 Click stimuli (0.1 ms transient) were presented to each ear independently to generate monaural  
128 evoked potentials. Peak amplitude (voltage from peak to trough) and latency (time to peak amplitude)  
129 were measured across the four peaks of the ABR waveform at 90 dB SPL (Figure 1A). The trough  
130 was considered the lowest point for that wave. Monaural data from the two ears were averaged to  
131 determine monaural amplitude and latency for each animal. Like hearing thresholds across  
132 frequency, click threshold was determined for each genotype and sex. Click threshold is determined  
133 by decreasing intensity of sound in 5 - 10 dB SPL steps until ABR waveforms disappear.

### 134 2.3.3 Binaural ABRs

135 Click stimuli at 90 dB SPL were also presented to both ears simultaneously to generate a binaural  
136 evoked potential. The binaural interaction component (BIC) of the ABR was calculated by  
137 subtracting the sum of the two monaural ABRs from the binaural ABR (Laumen et al., 2016;  
138 Benichoux et al., 2018)(Figure 1B and C). BIC amplitude and latency were then measured using

139

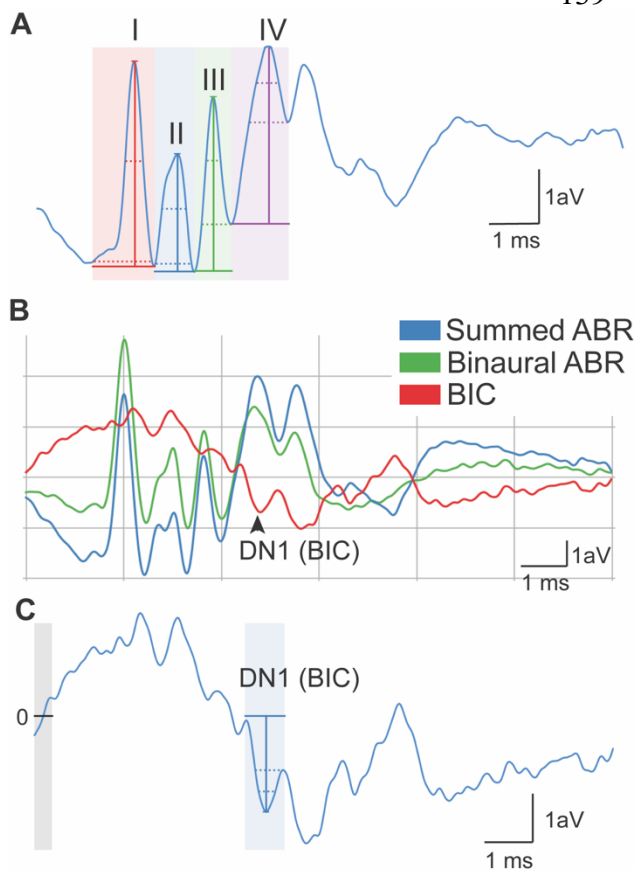

custom Python software, with amplitude being relative to the zero baseline of the measurement (Figure 1C, gray area with line). BIC was characterized as the prominent negative DN1 wave corresponding to the fourth wave of the binaural and summed ABR (Figure 1B). To measure interaural timing difference (ITD) computation using the BIC, animals were presented with stimuli that had varying ITDs of  $\pm 2 \text{ ms}$  in 0.5 ms steps and corresponding BIC amplitudes and latencies were calculated like above. This ITD range was chosen to be comparable to other studies in small rodents (Benichoux et al., 2018).

**Figure 1. Quantification of ABR signals.** Monaural ABR amplitudes were quantified for each ear as the voltage between the peak of the ABR and trough of the waveform for waves I-IV (A). Latency was calculated as the time when the height of the peak occurred. DN1 or BIC (red) was calculated as the prominent negative peak corresponding with wave IV of the summed (blue) and binaural (green)(B). BIC is calculated as the summed ABR subtracted from the binaural ABR. The BIC amplitude was calculated as voltage at the peak of the DN1 waveform to the baseline (0, line and gray area) of the measurement (C). Scale represents 1 voltage unit (Y) during 1 ms (X).

### 165 2.4 Analysis of ABR waveforms

166 Custom python software was used to analyze evoked potentials for monaural and binaural stimuli  
167 (New et al., 2021). To account for fluctuation in the baseline signal of the ABR, raw traces were

168 zeroed to establish a baseline across traces. The software included automatic peak detection with the  
 169 capability of manual correction or deselection upon visual confirmation.

## 170 2.5 Statistical analyses

171 Figures were generated using R Studio (R Core Team, 2013), ggplot2 (Wickham, 2016), and Adobe  
 172 Illustrator (Adobe, San Jose, CA USA). Data points on Figures 3, 4, and 5 represent means and error  
 173 bars reflect standard error, boxplots in Figure 2 display the median and 25<sup>th</sup> – 75<sup>th</sup> percentiles (or 1<sup>st</sup>  
 174 and 3<sup>rd</sup> quartiles respectively) the whiskers represent +/- 1.5 times the interquartile range. Data that  
 175 falls outside the range are plotted as individual points. Multivariate data (monaural peak amplitude  
 176 and latency, audiogram, and BIC amplitude and latency across ITD) were analyzed using linear  
 177 mixed effects (lme4) models (Bates et al., 2015) with sex, genotype, and condition (ITD, Frequency,

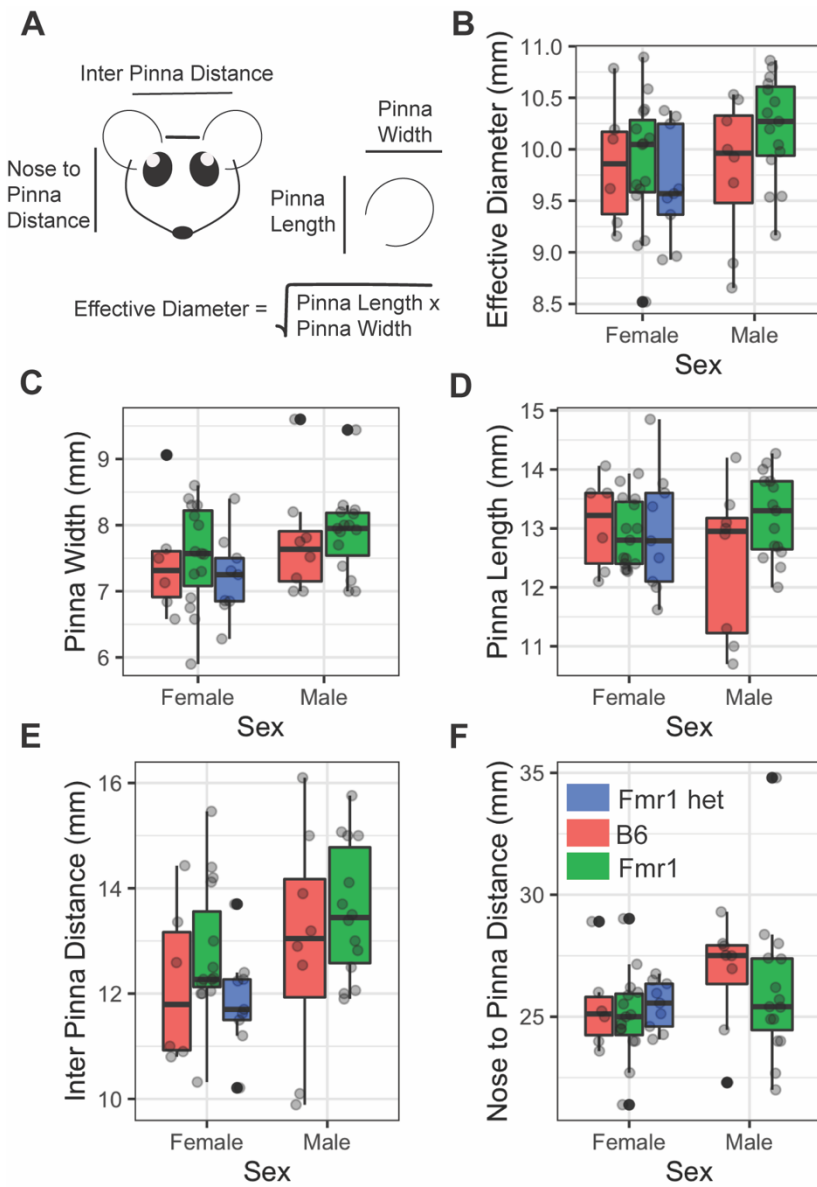

Peak) as fixed effects and animal as a random effect. It was expected that there may be differences between the sexes and genotypes therefore a priori, it was determined that estimated marginal means (emmeans; (Lenth, 2019)) would be used for pairwise comparisons between sexes and genotype. Two-way ANOVAs were performed to compare relationships between morphological features, sex, and genotype with adjusted Tukey posthoc analysis to compare groups. Where values are indicated as statistically significant between the two genotypes, \* indicated a p-value of < 0.05, \*\* = p < 0.01, and \*\*\* = p < 0.0001.

**Figure 2. Morphological features of FXS mice.** Pinna and head features (A) were measured between the sexes (x-axis) and genotypes (purple = B6, teal = Fmr1, yellow = Fmr1 het). There was no difference between the sexes or genotypes for any of the measures (effective diameter B, pinna width C, pinna length D, inter pinna length E, or nose to pinna length F). Data represent 6 B6, 15 Fmr1, 9 Fmr1 het females and 8 B6, 15 Fmr1 males.

## 4 Results

211 We used both morphological and physiological features to examine hearing differences in a  
 212 commonly used mouse model of FXS, C57BL/6J across genotypes and sexes. Hearing measurements

213 included frequency hearing range, monaural hearing ability, and binaural processing using the ABR,  
 214 while morphological features included pinna and head measurements.

#### 215 4.1 Morphological features

216 People with FXS have altered craniofacial features, including large ears (Loesch et al., 1988).  
 217 Consistent with our previous work (McCullagh et al., 2020a) we see no difference between B6,  
 218 Fmr1, or Fmr1 het animals for pinna attributes (Figure 2C pinna width, 2D pinna length, 2B effective  
 219 diameter). In addition, pinna characteristics were the same between the sexes ( $p = 0.175$  pinna width,  
 220  $p = 0.96$  pinna length,  $p = 0.267$  effective diameter Figure 2B-D). When genotypes were compared  
 221 within the same sex, there were no differences in weight, but sexes were significantly different  
 222 independent of genotype ( $p = 0.0023$ ) with females weighing significantly less than males. Similar to  
 223 pinna morphology, there was no significant difference in either distance between pinna or distance  
 224 from the nose to pinna between the genotypes or sexes (Figure 2E and F). These data suggest that

225

mice do not share the same craniofacial changes, at least in the measurements described here, as people with FXS.

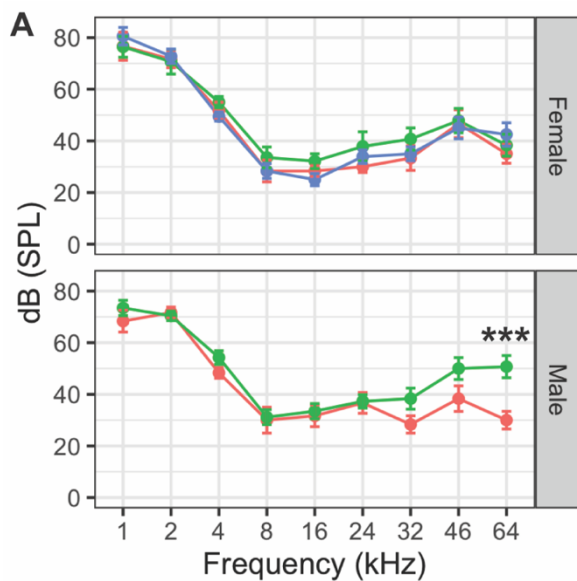

**Figure 3. Hearing range of FXS mice.** Hearing threshold (dB SPL) was measured across frequencies (1-64 kHz) in male and female mice of all genotypes (A). Fmr1 (green) males (lower panel) had significantly higher threshold hearing at 64 kHz compared to B6 (red) males. There were no differences in hearing range between female Fmr1 (green), B6 (red), and Fmr1 het (blue) mice (top panel A). When sexes were combined, the significant difference in hearing at 64 kHz persisted in Fmr1 animals compared to B6 but was not significant in female Fmr1 het animals (B). \*\* =  $p < 0.01$ , \*\*\* =  $p < 0.001$ . Data represent 6 B6, 7 Fmr1, 9 Fmr1 het females and 6 B6, 11 Fmr1 males.

#### 4.2 Hearing range

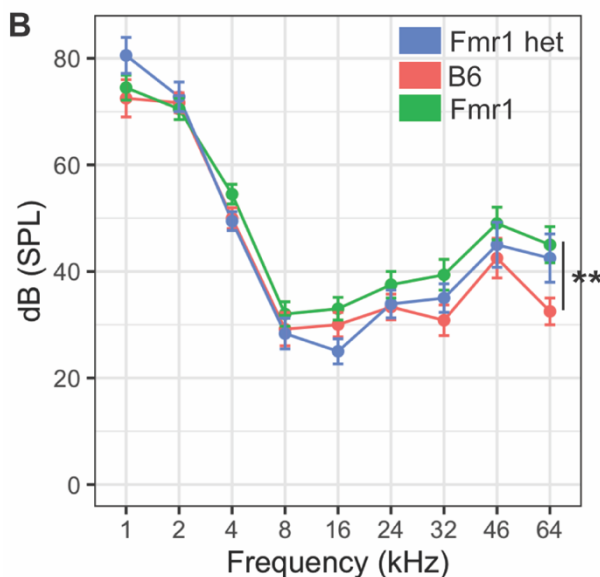

Our previous work showed that Fmr1 mice have increased thresholds for high frequency hearing compared to B6 at 16 kHz (McCullagh et al., 2020a). However, that work was limited by measuring only three frequencies (4, 8, 16 kHz) and seven mice of each genotype (combined sexes). Mice hear much higher frequencies than humans (Radziwon et al., 2009), therefore we wanted to measure whether this high frequency hearing loss exists across the frequencies in which mice hear in Fmr1 mutants and with a more in-depth sex specific analysis. Interestingly, there were no differences between genotypes across most of the frequencies tested except for an increase in hearing threshold at 64 kHz in Fmr1 mice compared to B6 (Figure 3B).

There were no significant differences in hearing

258 range between the sexes, but Fmr1 males did have significantly higher threshold at 64 kHz than

259 female *Fmr1* mice suggesting that the phenotype is mostly driven by males ( $p = 0.0317$ ) and indeed  
 260 both female *Fmr1* and female *Fmr1* het mice were not different than B6 females (Figure 3A). Best  
 261 frequencies for both genotypes, as indicated by lower threshold, of mice were between 8 – 64 kHz  
 262 consistent with specialized high frequency hearing.

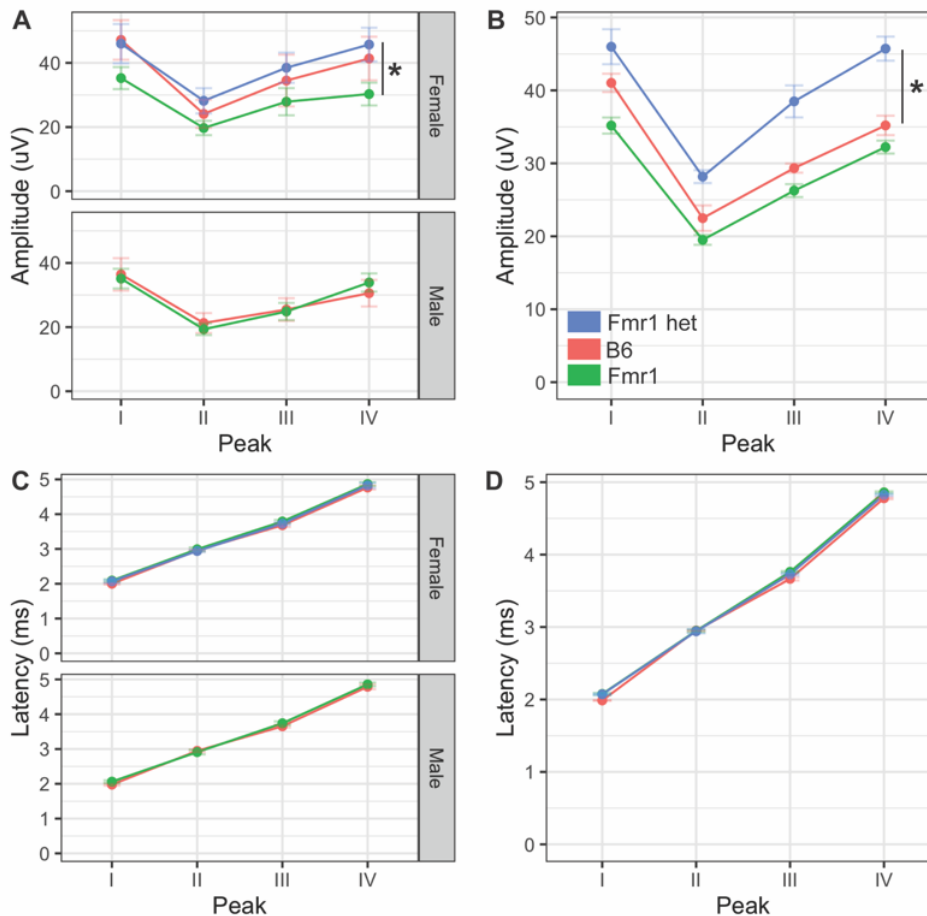

**Figure 4. Monaural hearing in FXS mice.** Monaural amplitudes and latencies for peaks I-IV of the ABR were recorded for *Fmr1*, *Fmr1* het, and B6 animals. Peak IV amplitude was significantly lower in *Fmr1* mice females compared to *Fmr1* het females (A upper), There were no significant differences in amplitudes for males (A, lower). When combined, there was a significant difference in *Fmr1* het animals compared to *Fmr1* (B). There was no difference in latency of peaks I-IV between sexes (C) or genotypes (D). \* =  $p < 0.05$ . Data represent 6 B6, 12 *Fmr1*, 9 *Fmr1* het females and 8 B6, 14 *Fmr1* males.

### 4.3 Monaural hearing

Amplitude and latency of

291 monaural ABRs correspond with neural activity across the ascending auditory pathway, with each  
 292 wave representing different brain areas involved in auditory processing (Alvarado et al., 2012). Other  
 293 studies have shown both latency and amplitude alterations in the FVB mouse strain of *Fmr1* mutation  
 294 (Kim et al., 2013; Rotschafer et al., 2015; El-Hassar et al., 2019). We measured ABR responses of  
 295 *Fmr1* mutants to monaural click stimuli compared to B6 mutant mice to determine if they have a  
 296 similar ABR phenotype to the FVB strain. We saw no differences in overall click threshold for either  
 297 genotype or sex ( $p = 0.102$  genotype and  $p = 0.47$  for sex). Amplitude of monaural responses was  
 298 significantly lower for wave IV of the ABR in *Fmr1* females compared to *Fmr1* het females (Figure  
 299 4A upper). Indeed, *Fmr1* het female amplitudes were closer to B6 than *Fmr1* females, though *Fmr1*  
 300 females were not significantly different from B6. In contrast, *Fmr1* male amplitudes for waves I-IV  
 301 were not different from B6 (Figure 4A lower). When sexes were combined, *Fmr1* het females had  
 302 significantly higher amplitudes than B6, and were close to being significantly higher than *Fmr1* mice  
 303 ( $p = 0.0593$ ). Consistent with sex driving the differences in genotype, peak amplitudes varied  
 304 between the sexes. Female B6 mice had significantly higher amplitude peaks I and IV compared to  
 305 B6 males ( $p = 0.0295$  peak I and  $p = 0.0289$  peak IV). In contrast, there were no sex differences  
 306 between male and female *Fmr1* mice suggesting a more male-like phenotype (independent of  
 307 genotype) in homozygous *Fmr1* females. There were no differences between the sexes or genotypes  
 308 in latency of monaural peaks (Figure 4C and D).

309

#### 310 4.4 Binaural hearing

311 While the monaural ABR provides information about binaural areas of the brainstem (potentially  
 312 peaks III and IV), since they are elicited by either sound played directly to one ear (closed field) or  
 313 equally to both ears (open field), little information can be gained about binaural integration of sound  
 314 information. We used the BIC of the ABR to measure binaural processing ability of the brainstem as  
 315 the BIC varies with ITDs played to both ears. We saw no differences in amplitude of the BIC at any  
 316 ITD between the two genotypes ( $p = 0.809$ ) or with sex ( $p = 0.6904$ , Figure 5A, B), though there was  
 317 a significant difference between Fmr1 male and female mouse BIC amplitudes at 1.5 ms ITD.  
 318 Latency of the BIC was significantly slower in male Fmr1 compared to B6 (Figure 5C, lower panel)  
 319 only at 0 ITD, with no difference in genotype for female mice (Figure 5C, upper panel). When data  
 320 were combined for sexes across genotype, there was no significant difference in latency of the BIC at  
 321 any ITD (Figure 5D). There were differences in latency of the BIC between B6 (-1.5 ms) and Fmr1  
 322 (1 ms) males and females though there was no overall main effect of sex ( $p = 0.3367$ ).

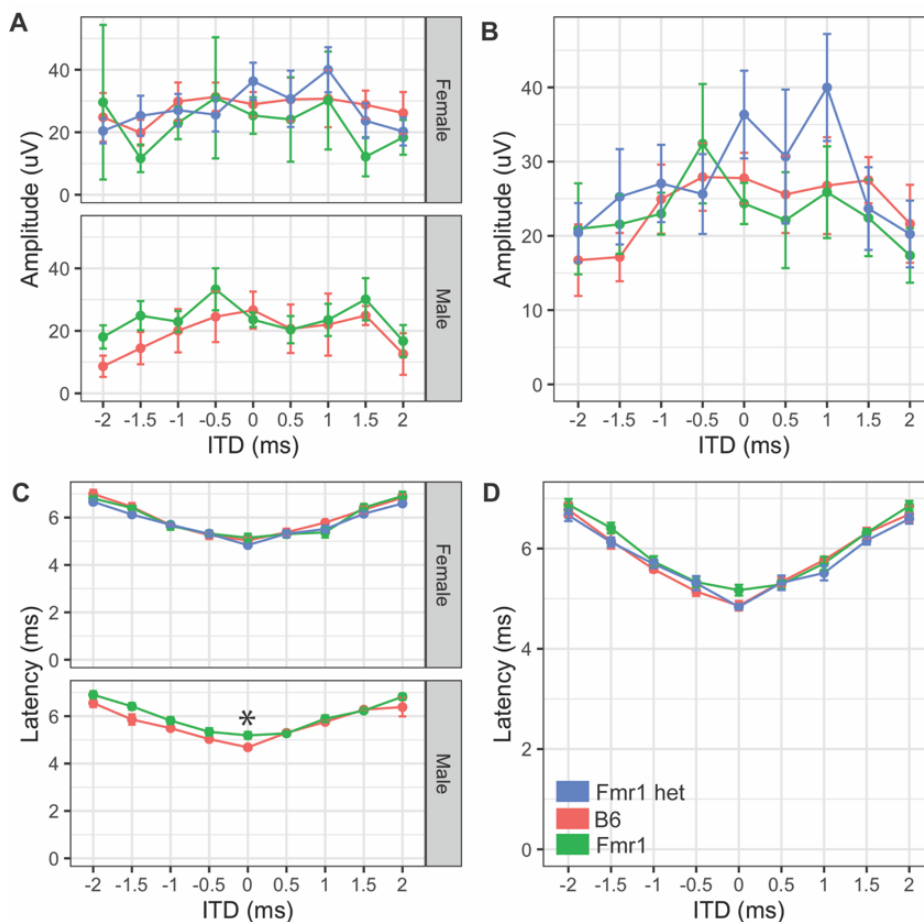

**Figure 5. Binaural hearing in FXS mice.** Binaural amplitudes and latencies for the BIC at ITDs between -2 to +2 ms in 0.5 ms steps were recorded for Fmr1 (green), Fmr1 het (blue), and B6 (red) animals. No differences in amplitude of the BIC with ITD for females (A upper), or males (A lower). When sexes were combined, there was no significant difference in amplitude of the BIC with ITD (B). Fmr1 males had significantly longer latency of the BIC at 0 ITD compared to B6 males (C, lower), while there was no difference in latency of female responses (C, upper). When sexes were combined, there was no difference in the BIC latency across ITDs between the genotypes (D). \* =  $p < 0.05$ . Data represent 6 B6, 7 Fmr1, 9 Fmr1 het females and 6 B6, 9 Fmr1 males.

352

#### 353 5 Discussion

354 This is the first study to characterize the ABR in the C57BL/6J Fmr1 mutant mouse, and in particular  
 355 highlights morphological characteristics, hearing range, monaural ABRs, and binaural integration  
 356 across sexes and in heterozygote females. Consistent with previous work, we see an increase in



357 hearing threshold at high frequencies in Fmr1 mice, though this phenotype is male specific, and no  
358 change in morphology (pinna or facial characteristics)(McCullagh et al., 2020a). Female Fmr1 mice  
359 have reduced wave IV amplitudes of the monaural ABR, and wildtype females have increased wave I  
360 and IV amplitudes compared to B6 males, suggesting that female Fmr1 mice have a more male-like  
361 phenotype for monaural ABR amplitude. Lastly, we showed that male Fmr1 mice have increased  
362 latency of the BIC at 0 ITD, but not other ITDs or changes in amplitude of the BIC across ITD  
363 compared to B6 animals suggesting changes in timing of the processing of binaural information that  
364 does not change overall ITD following ability.

365 Pinnae size and shape are the first feature available to determine sound localization ability in animals  
366 with external ears (Butler, 1975; Musicant and Butler, 1984). Craniofacial alterations including  
367 prominent ears and elongated face are hallmark features of humans with FXS (Loesch et al., 1988;  
368 Heulens et al., 2013) and indeed may be a factor in auditory hypersensitivity that has been  
369 underexplored. Consistent with our previous work, we see no alterations in pinna or facial  
370 characteristics in the C57BL/6J mouse model of FXS (McCullagh et al., 2020a) using calipers as a  
371 measurement tool. Others have explored morphological skull differences in FXS mice using different  
372 tools such as CT/MRI (Ellegood et al., 2010) and micro-CT (Heulens et al., 2013) with mixed results.  
373 Heulens et al., 2013 showed alterations in skull and jaw characteristics that had not been  
374 characterized previously with a similar technique (Ellegood et al., 2010) though differences may be  
375 due to how features were measured. We also see no difference in weight of Fmr1 animals compared  
376 to wildtype which is in contrast to our previous work where we noted that Fmr1 animals weighed less  
377 than wildtype (McCullagh et al., 2020a) and others that showed an increase in male Fmr1 mouse  
378 weight compared to wildtype (Leboucher et al., 2019). Differences in weight may be due to inclusion  
379 of female animals (McCullagh et al., 2020a) and older animals (Leboucher et al., 2019). Overall  
380 changes in pinna morphology may still be an important factor in sound localization ability in Fmr1  
381 animals and should be explored with more detailed techniques to determine if increased pinna  
382 measures in both humans and animal models may underly some aspect of auditory hypersensitivity  
383 symptomology.

384 Our previous results showed increased ABR measured hearing thresholds at high frequencies (16  
385 kHz) in the C57BL/6J Fmr1 strain with data combined for the sexes (McCullagh et al., 2020a). In the  
386 current study, we do not see increased thresholds at 16 kHz but do see similar increased thresholds at  
387 64 kHz in male Fmr1 mice specifically. These data are consistent with the increased thresholds  
388 across frequencies seen in adult male FVB Fmr1 mice (Rotschafer et al., 2015), though note that  
389 there was no change in threshold across frequencies in males of the same FVB strain at younger ages  
390 (Kim et al., 2013; El-Hassar et al., 2019). These data suggest that there may be age-related changes in  
391 high frequency hearing in adult male mice with FXS mutations across strains. This is particularly  
392 interesting since FVB mice are largely protected from early onset age-related hearing loss that the  
393 C57BL/6J background strain is particularly known for (Ison et al., 2007; Ho et al., 2014) suggesting  
394 that high frequency hearing deficits in males is a potentially conserved trait in FXS independent of  
395 background strain. Additional studies should examine hearing range across development and sexes in  
396 both strains to further show whether loss of high frequency hearing is a conserved feature in FXS.

397 Previous studies in the FVB Fmr1 mouse line show a robust wave I amplitude decrease in males  
398 across ages (Rotschafer et al., 2015; El-Hassar et al., 2019), though see (Kim et al., 2013). We do not  
399 see any change in wave I amplitude in the C57BL/6J Fmr1 line in adult animals of either sex. These  
400 conflicting results may be in part due to the earlier onset age-related hearing loss, which can be seen  
401 as decreases in early waves of the ABR, that occurs in the B6 background (Hunter and Willott,  
402 1987). Changes in wave I amplitude specific to FXS may be masked by overall decreases in wave I

403 amplitude across genotypes in this background. Interestingly, data in male FVB Fmr1 mice show no  
404 differences (adults, Kim et al., 2013; Rotschafer et al., 2015), or increased amplitudes in wave IV of  
405 the ABR (young, El-Hassar et al., 2019) whereas our data show decreased wave IV amplitude in  
406 Fmr1 females on the B6 background. These differences again may be due to differences in sexes and  
407 ages of animals tested. Lastly, our finding of no difference in latency of monaural waves is consistent  
408 with the majority of the work in FVB mice (Rotschafer et al., 2015; El-Hassar et al., 2019), though  
409 note that Kim et al., 2013 showed shorter latency for wave I. Our data further adds to the knowledge  
410 of ABR phenotypes that might be consistent across genotypes.

411 While ours is the first study to characterize the BIC in a FXS mutant mouse strain, our data are  
412 consistent with the BIC as it varies with ITD in mice (Benichoux et al., 2018). Namely, mice have a  
413 small range of ITD cues available due to their small head size and therefore the BIC amplitude  
414 decreases with increasing ITD between the ears, but this overall amplitude change is smaller than  
415 animals with more dominant ITD hearing ability (such as chinchilla or cats)(Benichoux et al., 2018).  
416 Additionally, consistent with previous work, the BIC latency gets longer with increasing ITD (Ferber  
417 et al., 2016; Laumen et al., 2016; Benichoux et al., 2018). Interestingly our work in FXS mice is  
418 consistent with increased latency of the BIC seen in a study in autistic people (ElMoazen et al.,  
419 2019), though they also see a decrease in amplitude of the BIC. Our findings that the BIC latency is  
420 only significant in males at 0 ITD potentially suggests that there is overall slowing of binaural  
421 processing in the brainstem, but that it is not dependent on ITD, which would be consistent with mice  
422 that do not rely as predominantly on ITD cues compared to other species.

423 The subject of sex differences in animal models is important for fully understanding the complexities  
424 of disorders such as autism spectrum disorder or FXS which seem to impact females differently than  
425 males (Werling and Geschwind, 2013; Nolan et al., 2017). In FXS, due to it being an X-linked  
426 disorder, there is a higher prevalence in males than females, which can undergo X-inactivation on the  
427 effected X chromosome (genetic mosaicism)(Kirchgessner et al., 1995). However, mice offer a  
428 unique opportunity to measure both heterozygote and homozygous females giving insight into  
429 potential sex differences related to loss of Fmr1 on one or both X chromosomes. Our data suggest  
430 that there are indeed differences in auditory phenotypes between heterozygous and homozygous  
431 females (wave IV amplitude) in addition to differences between males and females. These and future  
432 data comparing female Fmr1 subtypes may give insight into the role of X-inactivation in auditory  
433 brainstem processing phenotypes.

434 In conclusion, this study offers important insight into auditory phenotypes that may be shared or  
435 differ between background strains of FXS mice. Additionally, while subtle, we show sex-specific and  
436 full or heterozygote mutation-specific differences in auditory brainstem function for both monaural  
437 and binaural hearing in B6 mice. Further studies measuring auditory phenotypes for B6 mice in  
438 earlier ages across the sexes would be useful to further characterize potential similarities with the  
439 FVB Fmr1 strain. In addition, characterizing the BIC in the FVB strain would be useful to elucidate  
440 if latency phenotypes are consistent across backgrounds.

## 441 **6 Conflict of Interest**

442 *The authors declare that the research was conducted in the absence of any commercial or financial*  
443 *relationships that could be construed as a potential conflict of interest.*

## 444 **7 Author Contributions**

445 All authors helped write and revise the manuscript. EAM developed the ideas and methods. EAM  
446 and AC collected the data for the manuscript. EAM performed the statistical analyses and created the  
447 figures for the manuscript.

## 448 **8 Funding**

449 Supported by NIH 1R15HD105231-01. Preliminary work was also funded by a FRAXA research  
450 grant and NIH 3T32DC012280-05S1.

## 451 **9 Acknowledgements**

452 We would like to thank members of the McCullagh lab on team mouse that assisted with ABRs  
453 including Ishani Ray and Sabiha Alam. Further we would like to acknowledge Shani Poleg and  
454 Daniel Tollin for helping us set up these experiments in Colorado and continue them in Oklahoma.

## 455 **10 References**

- 456 Abbeduto, L., and Hagerman, R. J. (1997). Language and communication in fragile X syndrome.  
457 *Mental Retardation and Developmental Disabilities Research Reviews* 3, 313–322.  
458 doi:10.1002/(SICI)1098-2779(1997)3:4<313::AID-MRDD6>3.0.CO;2-O.
- 459 Alvarado, J. C., Fuentes-Santamaría, V., Jareño-Flores, T., Blanco, J. L., and Juiz, J. M. (2012).  
460 Normal variations in the morphology of auditory brainstem response (ABR) waveforms: a  
461 study in Wistar rats. *Neurosci Res* 73, 302–311. doi:10.1016/j.neures.2012.05.001.
- 462 Anbuhl, K. L., Benichoux, V., Greene, N. T., Brown, A. D., and Tollin, D. J. (2017). Development of  
463 the head, pinnae, and acoustical cues to sound location in a precocial species, the guinea pig  
464 (*Cavia porcellus*). *Hear Res* 356, 35–50. doi:10.1016/j.heares.2017.10.015.
- 465 Arnett, M. T., Herman, D. H., and McGee, A. W. (2014). Deficits in Tactile Learning in a Mouse  
466 Model of Fragile X Syndrome. *PLoS ONE* 9, e109116. doi:10.1371/journal.pone.0109116.
- 467 Bates, D., Mächler, M., Bolker, B., and Walker, S. (2015). Fitting Linear Mixed-Effects Models  
468 Using lme4. *Journal of Statistical Software* 67, 1–48. doi:10.18637/jss.v067.i01.
- 469 Beebe, K., Wang, Y., and Kulesza, R. (2014). Distribution of fragile X mental retardation protein in  
470 the human auditory brainstem. *Neuroscience* 273, 79–91.  
471 doi:10.1016/j.neuroscience.2014.05.006.
- 472 Benichoux, V., Ferber, A., Hunt, S., Hughes, E., and Tollin, D. (2018). Across Species “Natural  
473 Ablation” Reveals the Brainstem Source of a Noninvasive Biomarker of Binaural Hearing.  
474 *The Journal of Neuroscience* 38, 8563–8573. doi:10.1523/JNEUROSCI.1211-18.2018.
- 475 Beutelmann, R., Laumen, G., Tollin, D., and Klump, G. M. (2015). Amplitude and phase  
476 equalization of stimuli for click evoked auditory brainstem responses. *J Acoust Soc Am* 137,  
477 EL71–EL77. doi:10.1121/1.4903921.
- 478 Brittan-Powell, E. F., and Dooling, R. J. (2004). Development of auditory sensitivity in budgerigars  
479 (*Melopsittacus undulatus*). *The Journal of the Acoustical Society of America* 115, 3092–3102.  
480 doi:10.1121/1.1739479.

- 481 Bronkhorst, A. W. (2015). The cocktail-party problem revisited: early processing and selection of  
482 multi-talker speech. *Atten Percept Psychophys* 77, 1465–1487. doi:10.3758/s13414-015-  
483 0882-9.
- 484 Brown, M. R., Kronengold, J., Gazula, V.-R., Chen, Y., Strumbos, J. G., Sigworth, F. J., et al.  
485 (2010). Fragile X mental retardation protein controls gating of the sodium-activated  
486 potassium channel Slack. *Nature Neuroscience* 13, 819–821. doi:10.1038/nn.2563.
- 487 Butler, R. A. (1975). “The Influence of the External and Middle Ear on Auditory Discriminations,” in  
488 *Auditory System: Physiology (CNS)· Behavioral Studies Psychoacoustics Handbook of*  
489 *Sensory Physiology.*, eds. M. Abeles, Gö. Bredberg, R. A. Butler, J. H. Casseday, J. E.  
490 Desmedt, I. T. Diamond, et al. (Berlin, Heidelberg: Springer), 247–260. doi:10.1007/978-3-  
491 642-65995-9\_6.
- 492 Chen, L., and Toth, M. (2001). Fragile X mice develop sensory hyperreactivity to auditory stimuli.  
493 *Neuroscience* 103, 1043–1050.
- 494 Curry, R. J., Peng, K., and Lu, Y. (2018). Neurotransmitter- and Release-Mode-Specific Modulation  
495 of Inhibitory Transmission by Group I Metabotropic Glutamate Receptors in Central  
496 Auditory Neurons of the Mouse. *The Journal of Neuroscience* 38, 8187–8199.  
497 doi:10.1523/JNEUROSCI.0603-18.2018.
- 498 Dahlhaus, R. (2018). Of Men and Mice: Modeling the Fragile X Syndrome. *Front Mol Neurosci* 11.  
499 doi:10.3389/fnmol.2018.00041.
- 500 El-Hassar, L., Song, L., Tan, W. J. T., Large, C. H., Alvaro, G., Santos-Sacchi, J., et al. (2019).  
501 Modulators of Kv3 Potassium Channels Rescue the Auditory Function of Fragile X Mice. *The*  
502 *Journal of Neuroscience* 39, 4797–4813. doi:10.1523/JNEUROSCI.0839-18.2019.
- 503 Ellegood, J., Pacey, L. K., Hampson, D. R., Lerch, J. P., and Henkelman, R. M. (2010). Anatomical  
504 phenotyping in a mouse model of fragile X syndrome with magnetic resonance imaging.  
505 *Neuroimage* 53, 1023–1029. doi:10.1016/j.neuroimage.2010.03.038.
- 506 ElMoazen, D., Sobhy, O., Abdou, R., and Ismail, H. (2019). Binaural Interaction Component of the  
507 Auditory Brainstem Response in Children with Autism Spectrum Disorder. *International*  
508 *Journal of Pediatric Otorhinolaryngology*, 109850. doi:10.1016/j.ijporl.2019.109850.
- 509 Ethridge, L. E., White, S. P., Mosconi, M. W., Wang, J., Pedapati, E. V., Erickson, C. A., et al.  
510 (2017). Neural synchronization deficits linked to cortical hyper-excitability and auditory  
511 hypersensitivity in fragile X syndrome. *Molecular Autism* 8. doi:10.1186/s13229-017-0140-1.
- 512 Ferber, A. T., Benichoux, V., and Tollin, D. J. (2016). Test-Retest Reliability of the Binaural  
513 Interaction Component of the Auditory Brainstem Response. *Ear Hear* 37, e291-301.  
514 doi:10.1097/AUD.0000000000000315.
- 515 Garcia-Pino, E., Gessele, N., and Koch, U. (2017). Enhanced Excitatory Connectivity and Disturbed  
516 Sound Processing in the Auditory Brainstem of Fragile X Mice. *J. Neurosci.* 37, 7403–7419.  
517 doi:10.1523/JNEUROSCI.2310-16.2017.

- 518 Grothe, B., Pecka, M., and McAlpine, D. (2010). Mechanisms of sound localization in mammals.  
519 *Physiol. Rev.* 90, 983–1012. doi:10.1152/physrev.00026.2009.
- 520 Hagerman, R. J., and Hagerman, P. J. (2002). *Fragile X Syndrome: Diagnosis, Treatment and*  
521 *Research*. Baltimore: Johns Hopkins University Press.
- 522 Heulens, I., Suttie, M., Postnov, A., De Clerck, N., Perrotta, C. S., Mattina, T., et al. (2013).  
523 Craniofacial characteristics of fragile X syndrome in mouse and man. *Eur J Hum Genet* 21,  
524 816–823. doi:10.1038/ejhg.2012.265.
- 525 Ho, M. K., Li, X., Wang, J., Ohmen, J. D., and Friedman, R. A. (2014). FVB/NJ mice demonstrate a  
526 youthful sensitivity to noise-induced hearing loss and provide a useful genetic model for the  
527 study of neural hearing loss. *Audiol Neurotol Extra* 4, 1–11. doi:10.1159/000357770.
- 528 Hunter, K. P., and Willott, J. F. (1987). Aging and the auditory brainstem response in mice with  
529 severe or minimal presbycusis. *Hear Res* 30, 207–218. doi:10.1016/0378-5955(87)90137-7.
- 530 Ison, J. R., Allen, P. D., and O’Neill, W. E. (2007). Age-Related Hearing Loss in C57BL/6J Mice has  
531 both Frequency-Specific and Non-Frequency-Specific Components that Produce a  
532 Hyperacusis-Like Exaggeration of the Acoustic Startle Reflex. *J Assoc Res Otolaryngol* 8,  
533 539–550. doi:10.1007/s10162-007-0098-3.
- 534 Kim, H., Gibboni, R., Kirkhart, C., and Bao, S. (2013). Impaired Critical Period Plasticity in Primary  
535 Auditory Cortex of Fragile X Model Mice. *J Neurosci* 33, 15686–15692.  
536 doi:10.1523/JNEUROSCI.3246-12.2013.
- 537 Kirchgessner, C. U., Warren, S. T., and Willard, H. F. (1995). X inactivation of the FMR1 fragile X  
538 mental retardation gene. *J Med Genet* 32, 925–929.
- 539 Laumen, G., Ferber, A. T., Klump, G. M., and Tollin, D. J. (2016). The Physiological Basis and  
540 Clinical Use of the Binaural Interaction Component of the Auditory Brainstem Response. *Ear*  
541 *Hear* 37, e276-90. doi:10.1097/AUD.0000000000000301.
- 542 Leboucher, A., Bermudez-Martin, P., Mouska, X., Amri, E.-Z., Pisani, D. F., and Davidovic, L.  
543 (2019). *Fmr1*-Deficiency Impacts Body Composition, Skeleton, and Bone Microstructure in a  
544 Mouse Model of Fragile X Syndrome. *Front Endocrinol (Lausanne)* 10, 678.  
545 doi:10.3389/fendo.2019.00678.
- 546 Levine, R. A. (1981). Binaural interaction in brainstem potentials of human subjects. *Annals of*  
547 *Neurology* 9, 384–393. doi:10.1002/ana.410090412.
- 548 Loesch, D. Z., Lafranchi, M., and Scott, D. (1988). Anthropometry in Martin-Bell syndrome. *Am J*  
549 *Med Genet* 30, 149–164. doi:10.1002/ajmg.1320300113.
- 550 Lu, Y. (2019). Subtle differences in synaptic transmission in medial nucleus of trapezoid body  
551 neurons between wild-type and *Fmr1* knockout mice. *Brain Research* 1717, 95–103.  
552 doi:10.1016/j.brainres.2019.04.006.

- 553 McCullagh, E. A., Poleg, S., Greene, N. T., Huntsman, M. M., Tollin, D. J., and Klug, A. (2020a).  
554 Characterization of Auditory and Binaural Spatial Hearing in a Fragile X Syndrome Mouse  
555 Model. *eNeuro* 7. doi:10.1523/ENEURO.0300-19.2019.
- 556 McCullagh, E. A., Rotschafer, S. E., Auerbach, B. D., Klug, A., Kaczmarek, L. K., Cramer, K. S., et  
557 al. (2020b). Mechanisms underlying auditory processing deficits in Fragile X syndrome. *The*  
558 *FASEB Journal* 00, 1–18. doi:<https://doi.org/10.1096/fj.201902435R>.
- 559 McCullagh, E. A., Salcedo, E., Huntsman, M. M., and Klug, A. (2017). Tonotopic alterations in  
560 inhibitory input to the medial nucleus of the trapezoid body in a mouse model of Fragile X  
561 syndrome. *Journal of Comparative Neurology* 262, 375. doi:10.1002/cne.24290.
- 562 Musicant, A. D., and Butler, R. A. (1984). The influence of pinnae-based spectral cues on sound  
563 localization. *The Journal of the Acoustical Society of America* 75, 1195–1200.  
564 doi:10.1121/1.390770.
- 565 New, E. M., Li, B.-Z., Lei, T., and McCullagh, E. A. (2021). Hearing Ability of Prairie Voles  
566 (*Microtus ochrogaster*). doi:10.1101/2021.10.07.463519.
- 567 Nolan, S. O., Reynolds, C. D., Smith, G. D., Holley, A. J., Escobar, B., Chandler, M. A., et al.  
568 (2017). Deletion of *Fmr1* results in sex-specific changes in behavior. *Brain and Behavior* 7,  
569 e00800. doi:10.1002/brb3.800.
- 570 R Core Team (2013). *R: A Language and Environment for Statistical Computing*. Vienna, Austria: R  
571 Foundation for Statistical Computing Available at: <http://www.R-project.org/>.
- 572 Radziwon, K. E., June, K. M., Stolzberg, D. J., Xu-Friedman, M. A., Salvi, R. J., and Dent, M. L.  
573 (2009). Behaviorally measured audiograms and gap detection thresholds in CBA/CaJ mice. *J*  
574 *Comp Physiol A Neuroethol Sens Neural Behav Physiol* 195, 961–969. doi:10.1007/s00359-  
575 009-0472-1.
- 576 Rotschafer, S. E., and Cramer, K. S. (2017). Developmental Emergence of Phenotypes in the  
577 Auditory Brainstem Nuclei of *Fmr1* Knockout Mice. *eNeuro* 4, 1–21.  
578 doi:10.1523/ENEURO.0264-17.2017.
- 579 Rotschafer, S. E., Marshak, S., and Cramer, K. S. (2015). Deletion of *Fmr1* Alters Function and  
580 Synaptic Inputs in the Auditory Brainstem. *PLoS ONE* 10, 1–15.  
581 doi:10.1371/journal.pone.0117266.
- 582 Santos, M., Marques, C., Nóbrega Pinto, A., Fernandes, R., Coutinho, M. B., and Almeida E Sousa,  
583 C. (2017). Autism spectrum disorders and the amplitude of auditory brainstem response wave  
584 I. *Autism Res* 10, 1300–1305. doi:10.1002/aur.1771.
- 585 Stefanelli, A. C. G. F., Zanchetta, S., Furtado, E. F., Stefanelli, A. C. G. F., Zanchetta, S., and  
586 Furtado, E. F. (2020). Auditory hyper-responsiveness in autism spectrum disorder,  
587 terminologies and physiological mechanisms involved: systematic review. *CoDAS* 32.  
588 doi:10.1590/2317-1782/20192018287.

- 589 The Dutch-Belgian Fragile X Consortium, Bakker, C. E., Verheij, C., Willemsen, R., van der Helm,  
590 R., Oerlemans, F., et al. (1994). Fmr1 knockout mice: A model to study fragile X mental  
591 retardation. *Cell* 78, 23–33. doi:10.1016/0092-8674(94)90569-X.
- 592 Tian, Y., Yang, C., Shang, S., Cai, Y., Deng, X., Zhang, J., et al. (2017). Loss of FMRP Impaired  
593 Hippocampal Long-Term Plasticity and Spatial Learning in Rats. *Front Mol Neurosci* 10,  
594 269. doi:10.3389/fnmol.2017.00269.
- 595 Till, S. M., Asiminas, A., Jackson, A. D., Katsanevaki, D., Barnes, S. A., Osterweil, E. K., et al.  
596 (2015). Conserved hippocampal cellular pathophysiology but distinct behavioural deficits in a  
597 new rat model of FXS. *Hum Mol Genet* 24, 5977–5984. doi:10.1093/hmg/ddv299.
- 598 Visser, E., Zwiers, M. P., Kan, C. C., Hoekstra, L., van Opstal, A. J., and Buitelaar, J. K. (2013).  
599 Atypical vertical sound localization and sound-onset sensitivity in people with autism  
600 spectrum disorders. *J Psychiatry Neurosci* 38, 398–406. doi:10.1503/jpn.120177.
- 601 Wang, T., de Kok, L., Willemsen, R., Elgersma, Y., and Borst, J. G. G. (2015). In vivo synaptic  
602 transmission and morphology in mouse models of Tuberous sclerosis, Fragile X syndrome,  
603 Neurofibromatosis type 1, and Costello syndrome. *Front Cell Neurosci* 9, 234.  
604 doi:10.3389/fncel.2015.00234.
- 605 Wang, Y., Sakano, H., Beebe, K., Brown, M. R., de Laat, R., Bothwell, M., et al. (2014). Intense and  
606 specialized dendritic localization of the fragile X mental retardation protein in binaural  
607 brainstem neurons: A comparative study in the alligator, chicken, gerbil, and human: FMRP  
608 localization in NL/MSO dendrites. *Journal of Comparative Neurology* 522, 2107–2128.  
609 doi:10.1002/cne.23520.
- 610 Werling, D. M., and Geschwind, D. H. (2013). Sex differences in autism spectrum disorders. *Curr*  
611 *Opin Neurol* 26, 146–153. doi:10.1097/WCO.0b013e32835ee548.
- 612 Wickham, H. (2016). *ggplot2: Elegant Graphics for Data Analysis*. Springer-Verlag New York  
613 Available at: <http://ggplot2.org>.
- 614
